# Supplementary material for: Preindustrial-to-present-day changes in atmospheric carbon monoxide: agreement and gaps between ice archives and global model reconstructions
Source: Copernicus journal article supplement (doi:10.5194/acp-25-1105-2025), 2025-01-28
Supplement: Supplementary file 1 [file acp-25-1105-2025-supplement.pdf]

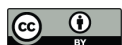

*Supplement of*

## **Preindustrial-to-present-day changes in atmospheric carbon monoxide: agreement and gaps between ice archives and global model reconstructions**

**Xavier Faïn et al.**

*Correspondence to:* Xavier Faïn ([xavier.fain@univ-grenoble-alpes.fr](mailto:xavier.fain@univ-grenoble-alpes.fr))

The copyright of individual parts of the supplement might differ from the article licence.

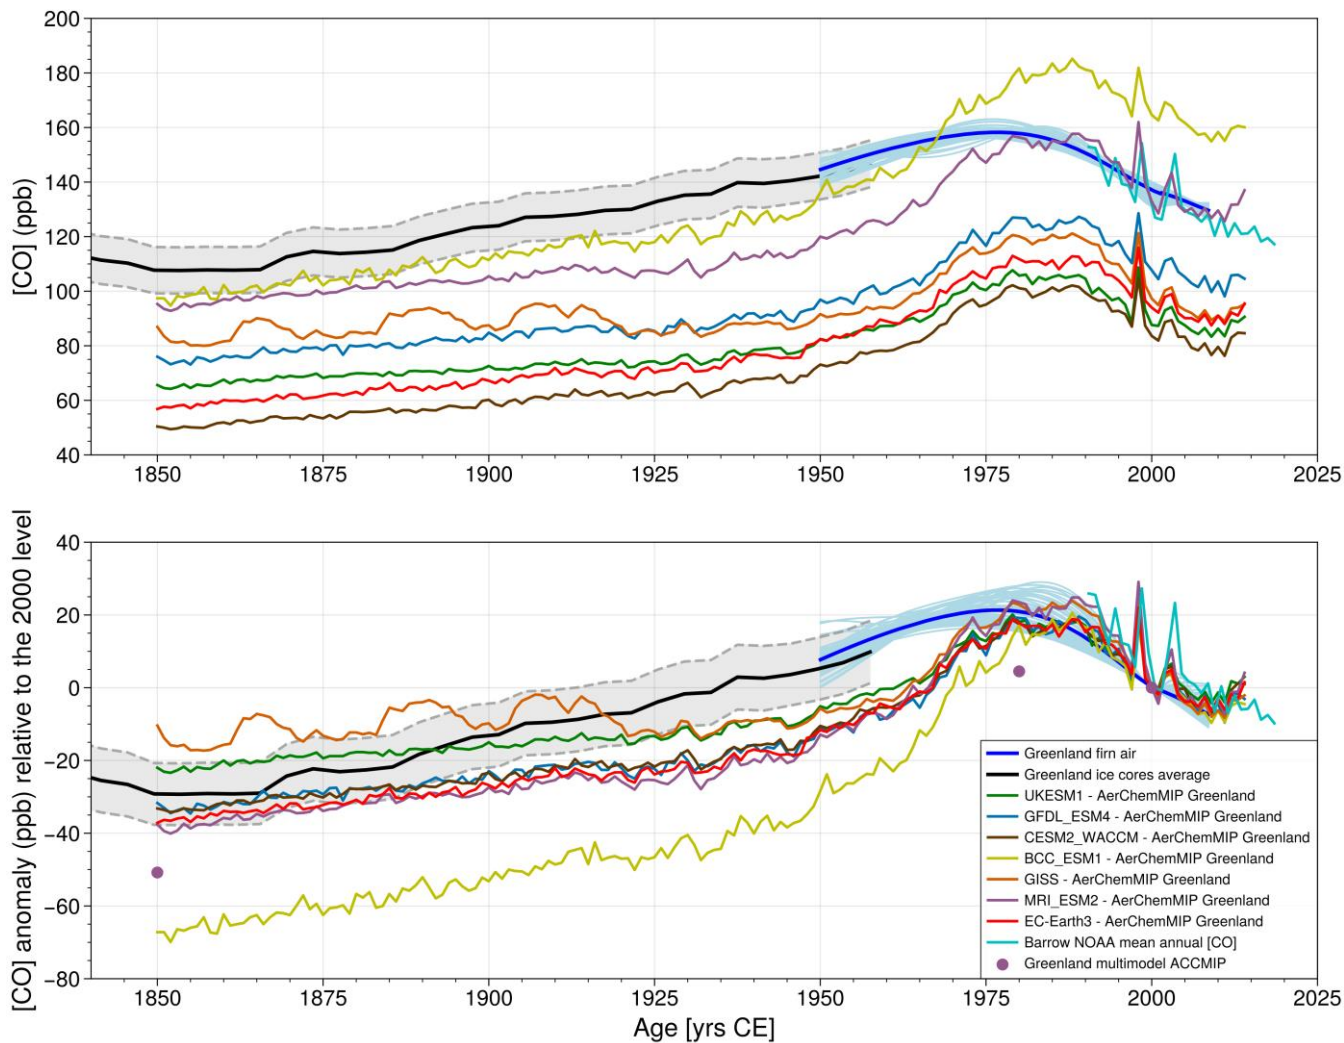

**Figure S1.** Individual AerChemMIP and ACCMIP model outputs included in this study for the Greenland area. Absolute values (upper panel) and anomalies relative to the 2000 CE levels (lower panel).

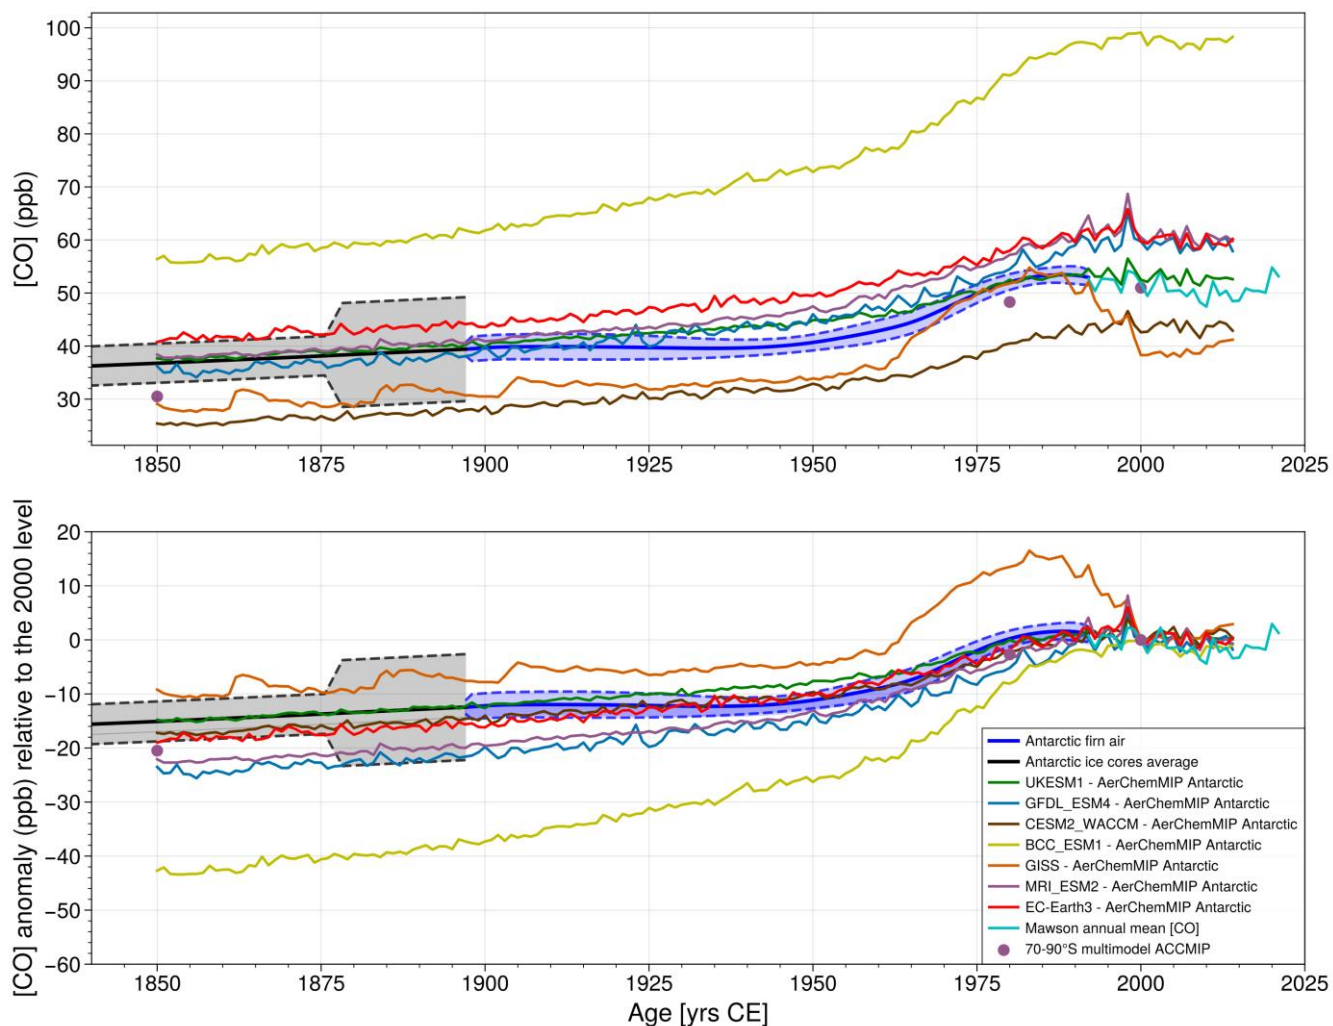

**Figure S2.** Individual AerChemMIP and ACCMIP model outputs included in this study for the Antarctica area. Absolute values (upper panel) and anomalies relative to the 2000 CE levels (lower panel).
